# Supplementary material for: Emulsifying mechanisms of phospholipids in high-pressure homogenization of perfluorocarbon nanoemulsions
Source: Royal Society of Chemistry journal article supplement (doi:10.1039/d4sm00828f), 2024-01-01
Supplement: d4sm00828f1.pdf [file d4sm00828f1.pdf]

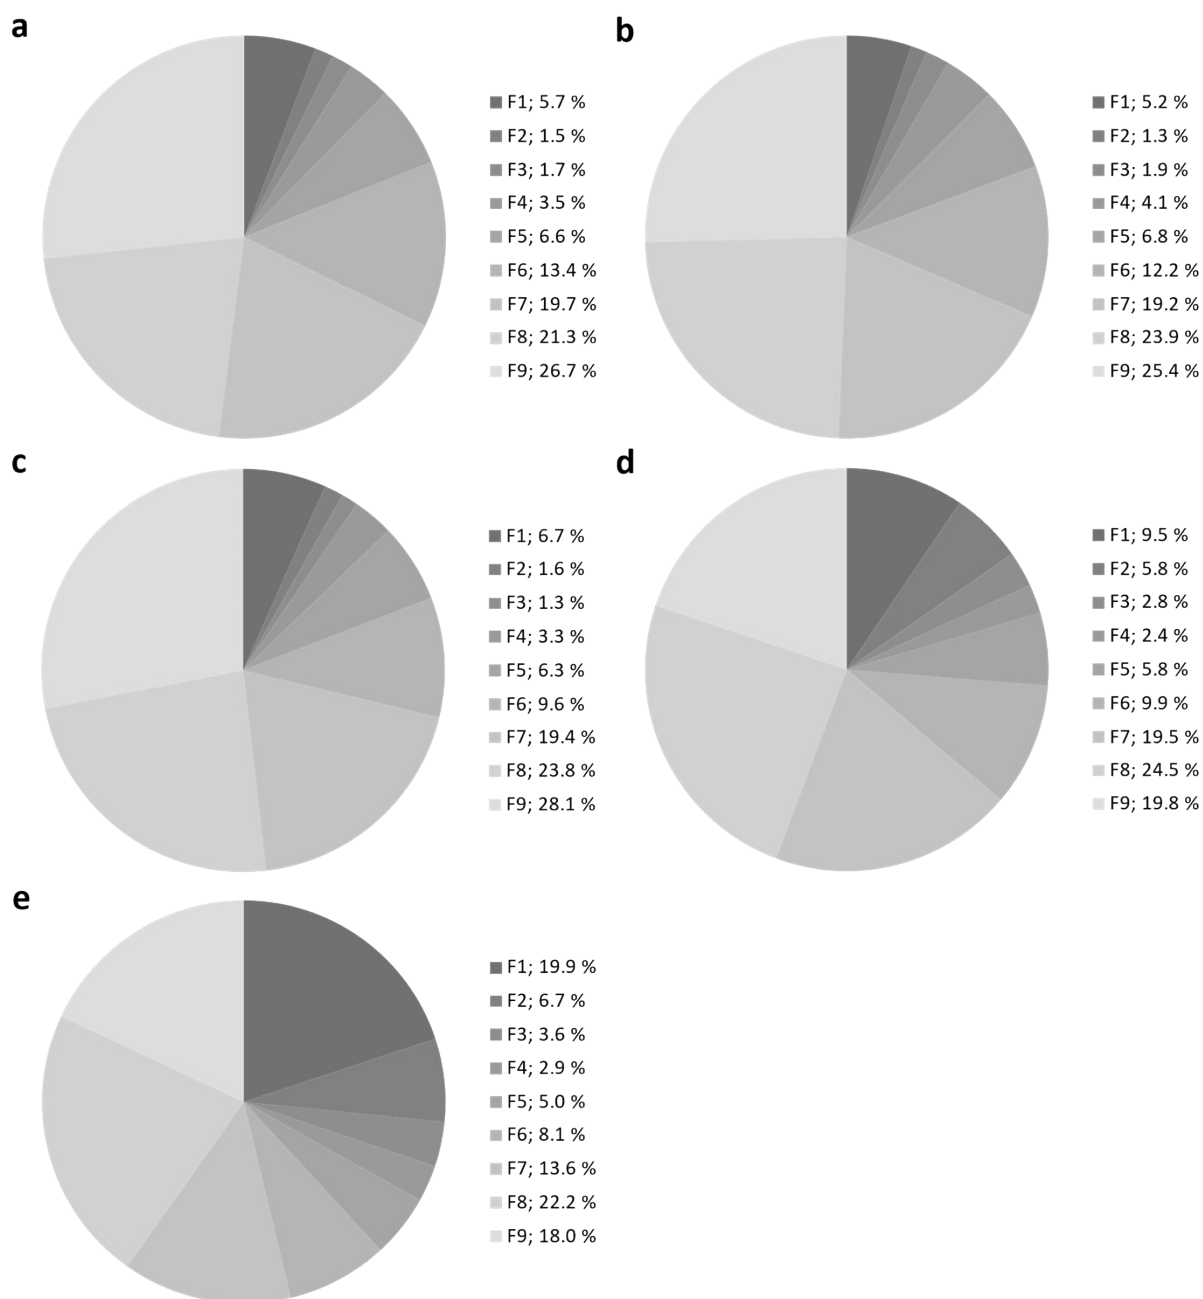

**Figure S1:** Count rate percentages of all fractions after separation using a sucrose gradient in dependence on the cholesterol content  $x_{chol}$ . Representation of the count rate percentages at (a) 5 mol%, (b) 10 mol%, (c) 20 mol%, (d) 30 mol% and (e) 40 mol%.

**Table S1:** Summary of the particle size (Z-Average), particle distribution index (Pdl), derived count rate (DCR) and the count rate percentage of fractions after separation using a sucrose gradient for the variation of the cholesterol percentage. The values are given as mean  $\pm$  standard deviation (SD), n = 3.

| Cholesterol percentage [mol%] | Z-Average [nm]            |      | Pdl   |       | DCR [kcps] |       |      |     |      |     |
|-------------------------------|---------------------------|------|-------|-------|------------|-------|------|-----|------|-----|
|                               | Mean                      | SD   | Mean  | SD    | Mean       | SD    |      |     |      |     |
| <b>5</b>                      | 153.8                     | 30.3 | 0.362 | 0.056 | 5281.4     | 93.7  |      |     |      |     |
| <b>10</b>                     | 133.1                     | 9.6  | 0.358 | 0.016 | 3451.6     | 147.5 |      |     |      |     |
| <b>20</b>                     | 158.5                     | 19.4 | 0.320 | 0.010 | 4222.6     | 195.8 |      |     |      |     |
| <b>30</b>                     | 173.8                     | 23.1 | 0.374 | 0.044 | 3653.9     | 140.9 |      |     |      |     |
| <b>40</b>                     | 258.6                     | 21.3 | 0.470 | 0.069 | 3616.5     | 331.0 |      |     |      |     |
|                               | Count rate percentage [%] |      |       |       |            |       |      |     |      |     |
|                               | 5                         |      | 10    |       | 20         |       | 30   |     | 40   |     |
| Fraction                      | Mean                      | SD   | Mean  | SD    | Mean       | SD    | Mean | SD  | Mean | SD  |
| <b>F1</b>                     | 5.7                       | 1.8  | 5.2   | 0.2   | 6.7        | 0.7   | 9.5  | 2.4 | 19.9 | 2.5 |
| <b>F2</b>                     | 1.5                       | 0.6  | 1.3   | 0.1   | 1.6        | 0.1   | 5.8  | 2.6 | 6.7  | 1.2 |
| <b>F3</b>                     | 1.7                       | 0.2  | 1.9   | 0.3   | 1.3        | 0.0   | 2.8  | 1.3 | 3.6  | 1.1 |
| <b>F4</b>                     | 3.4                       | 0.2  | 4.1   | 0.2   | 3.3        | 0.2   | 2.4  | 0.1 | 2.9  | 0.4 |
| <b>F5</b>                     | 6.6                       | 0.4  | 6.8   | 0.2   | 6.3        | 0.1   | 5.8  | 0.6 | 5.0  | 0.1 |
| <b>F6</b>                     | 13.4                      | 2.3  | 12.2  | 2.7   | 9.6        | 0.7   | 9.9  | 0.5 | 8.1  | 0.1 |
| <b>F7</b>                     | 19.7                      | 0.6  | 19.2  | 1.8   | 19.4       | 1.0   | 19.5 | 0.9 | 13.6 | 2.7 |
| <b>F8</b>                     | 21.3                      | 0.3  | 23.9  | 1.0   | 23.8       | 0.4   | 24.5 | 2.0 | 22.2 | 1.3 |
| <b>F9</b>                     | 26.7                      | 4.4  | 25.4  | 2.9   | 28.1       | 1.6   | 19.8 | 7.6 | 18.0 | 5.3 |

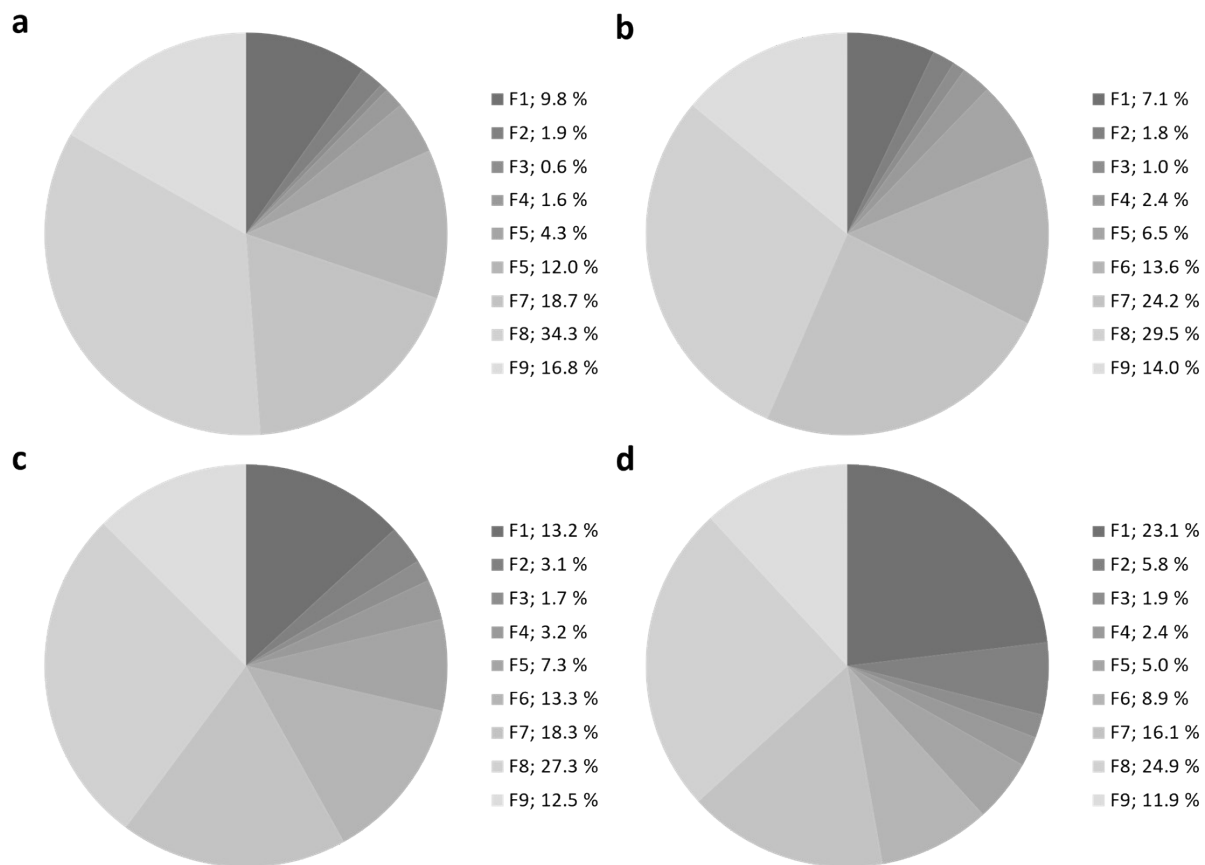

**Figure S2:** Count rate percentages of all fractions after separation using a sucrose gradient in dependence on the lipid concentration  $c_L$ . Representation of the count rate percentages at (a) 2.5 mM, (b) 5 mM, (c) 10 mM and (d) 15 mM.

**Table S2:** Summary of the particle size (Z-Average), polydispersity index (Pdl), derived count rate (DCR) and the count rate percentage of fractions after separation using a sucrose gradient for the variation of lipid concentration. The values are given as mean  $\pm$  SD, n = 3.

| Lipid concentration [mM]         | Z-Average [nm] |     | Pdl   |       | DCR [kcps] |       |      |     |
|----------------------------------|----------------|-----|-------|-------|------------|-------|------|-----|
|                                  | Mean           | SD  | Mean  | SD    | Mean       | SD    |      |     |
| 2.5                              | 142.1          | 2.5 | 0.277 | 0.028 | 1726.9     | 72.2  |      |     |
| 5                                | 124.1          | 4.5 | 0.247 | 0.008 | 3783.4     | 108.7 |      |     |
| 7.5                              | 138.9          | 4.5 | 0.280 | 0.026 | 6492.7     | 229.1 |      |     |
| 15                               | 142.4          | 1.3 | 0.271 | 0.003 | 7106.9     | 528.3 |      |     |
| <b>Count rate percentage [%]</b> |                |     |       |       |            |       |      |     |
|                                  | 2.5            |     | 5     |       | 7.5        |       | 15   |     |
| Fraction                         | Mean           | Sd  | Mean  | SD    | Mean       | SD    | Mean | SD  |
| F1                               | 9.8            | 2.3 | 7.1   | 0.7   | 13.2       | 0.8   | 23.1 | 1.3 |
| F2                               | 1.9            | 0.2 | 1.8   | 0.2   | 3.1        | 0.8   | 5.8  | 1.2 |
| F3                               | 0.6            | 0.1 | 1.0   | 0.1   | 1.7        | 0.3   | 1.9  | 0.2 |
| F4                               | 1.6            | 0.2 | 2.4   | 0.2   | 3.2        | 0.7   | 2.4  | 0.2 |
| F5                               | 4.3            | 0.0 | 6.5   | 0.5   | 7.3        | 2.3   | 5.0  | 0.2 |
| F6                               | 12.0           | 0.4 | 13.6  | 3.2   | 13.3       | 0.7   | 8.9  | 1.8 |
| F7                               | 18.7           | 1.2 | 24.2  | 1.6   | 18.3       | 0.2   | 16.1 | 1.0 |
| F8                               | 34.4           | 5.7 | 29.5  | 1.8   | 27.3       | 3.6   | 24.9 | 1.4 |
| F9                               | 16.8           | 2.8 | 14.0  | 6.4   | 12.5       | 0.7   | 11.9 | 5.4 |

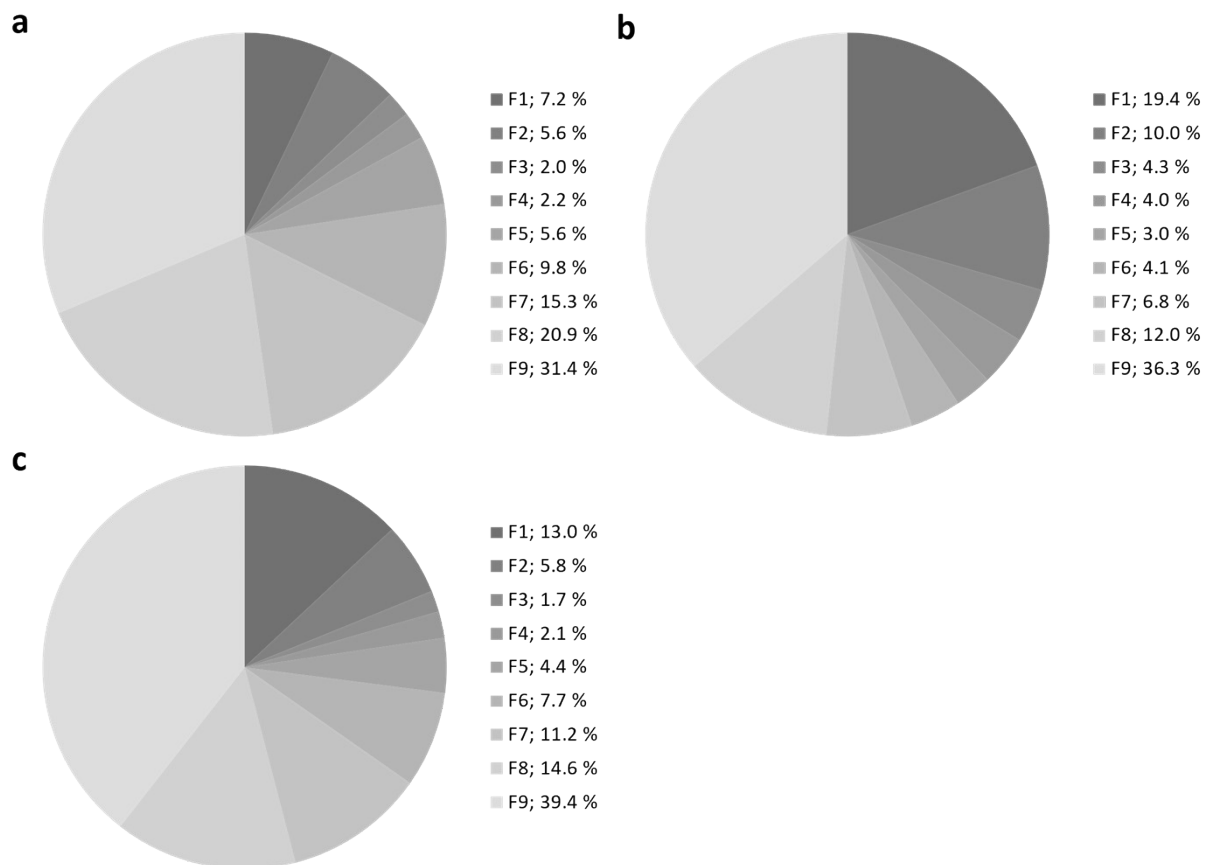

**Figure S3:** Count rate percentages of all fractions after separation using a sucrose gradient dependent on the phospholipid chain length. Representation of the count rate percentages of (a) DMPC, (b) DPPC and (c) DSPC.

**Table S3:** Summary of the particle size (Z-Average), polydispersity index (Pdl), derived count rate (DCR) and the count rate percentage of fractions after separation using a sucrose gradient for the variation of the phospholipid fatty acid chain length. The values are given as mean  $\pm$  SD, n = 3.

| PL chain length | Z-Average [nm] |      | Pdl   |       | DCR [kcps] |       |
|-----------------|----------------|------|-------|-------|------------|-------|
|                 | Mean           | SD   | Mean  | SD    | Mean       | SD    |
| DMPC            | 367.1          | 42.4 | 0.745 | 0.163 | 2261.9     | 589.6 |
| DPPC            | 282.6          | 34.2 | 0.660 | 0.188 | 3083.4     | 162.9 |
| DSPC            | 508.1          | 57.6 | 0.405 | 0.253 | 1749.2     | 211.5 |
|                 | DCR [%]        |      |       |       |            |       |
|                 | DMPC           |      | DPPC  |       | DSPC       |       |
| Fraction        | Mean           | SD   | Mean  | SD    | Mean       | SD    |
| F1              | 7.2            | 1.6  | 19.4  | 2.9   | 13.0       | 3.4   |
| F2              | 5.6            | 1.2  | 10.0  | 2.6   | 5.8        | 1.3   |
| F3              | 2.0            | 0.2  | 4.3   | 3.5   | 1.7        | 0.6   |
| F4              | 2.2            | 0.3  | 4.0   | 3.7   | 2.1        | 0.3   |
| F5              | 5.6            | 1.1  | 3.0   | 1.3   | 4.4        | 1.4   |
| F6              | 9.8            | 2.0  | 4.1   | 1.1   | 7.7        | 0.4   |
| F7              | 15.3           | 3.8  | 6.8   | 2.2   | 11.2       | 1.4   |
| F8              | 20.9           | 2.3  | 12.0  | 4.0   | 14.6       | 2.3   |
| F9              | 31.4           | 3.4  | 36.3  | 18.1  | 39.4       | 8.4   |

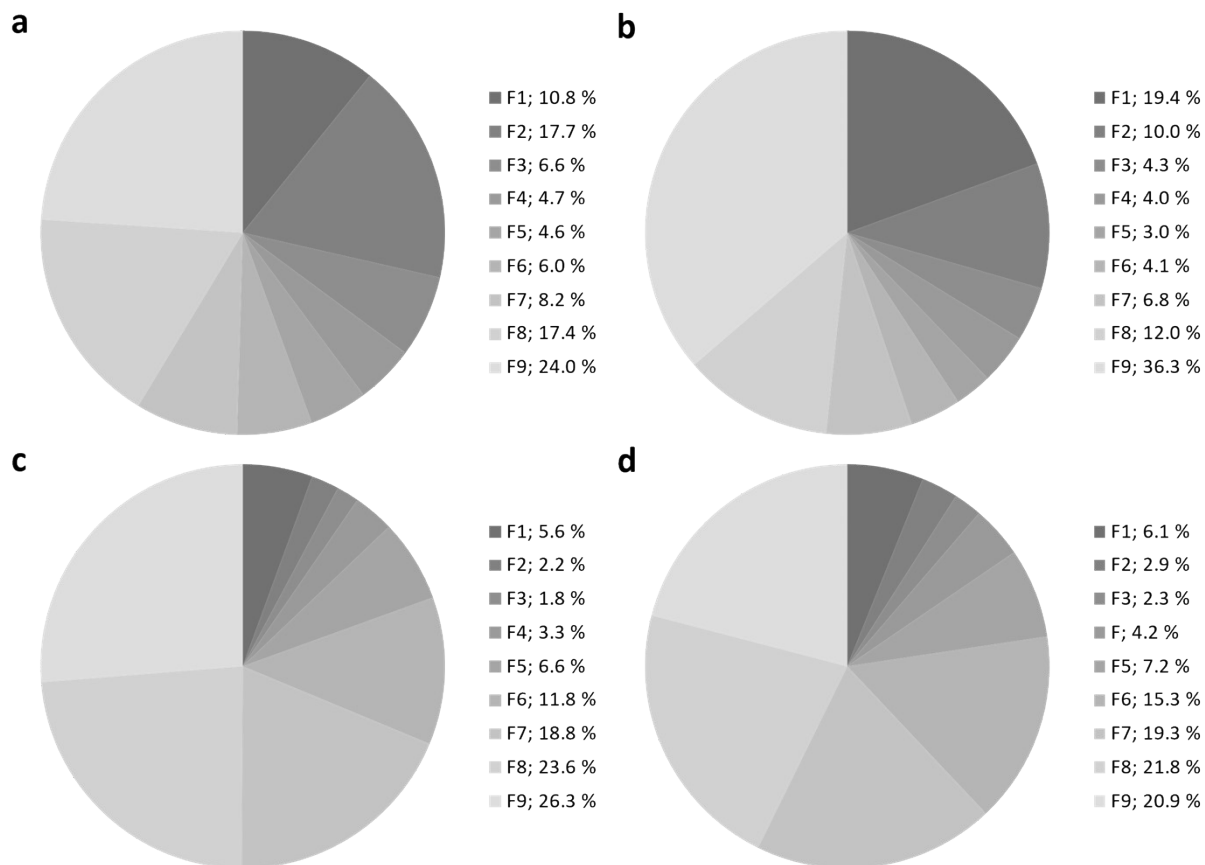

**Figure S4:** Count rate percentages of all fractions after separation using a sucrose gradient dependent on the phospholipid head group. Representation of the count rate percentages of (a) DPPE, (b) DPPC, (c) DPPG and (d) DPPA.

**Table S4:** Summary of the particle size (Z-Average), polydispersity index (Pdl), derived count rate (DCR) and the count rate percentage of fractions after separation using a sucrose gradient for the variation of the phospholipid head group. The values are given as mean  $\pm$  SD, n = 3.

| PL head group                    | Z-Average [nm] |      | Pdl   |       | DCR [kcps] |       |      |     |
|----------------------------------|----------------|------|-------|-------|------------|-------|------|-----|
|                                  | Mean           | SD   | Mean  | SD    | Mean       | SD    |      |     |
| DPPE                             | 717.8          | 78.5 | 0.918 | 0.062 | 1622.9     | 162.3 |      |     |
| DPPC                             | 282.6          | 34.2 | 0.791 | 0.034 | 3083.4     | 162.9 |      |     |
| DPPG                             | 165.4          | 15.2 | 0.255 | 0.016 | 4048.3     | 846.1 |      |     |
| DPPA                             | 125.2          | 2.4  | 0.247 | 0.014 | 5944.8     | 201.1 |      |     |
| <b>Count rate percentage [%]</b> |                |      |       |       |            |       |      |     |
|                                  | DPPE           |      | DPPC  |       | DPPG       |       | DPPA |     |
| Fraction                         | Mean           | Sd   | Mean  | SD    | Mean       | SD    | Mean | SD  |
| F1                               | 10.8           | 4.9  | 19.4  | 2.9   | 5.6        | 2.0   | 6.1  | 0.8 |
| F2                               | 17.7           | 2.3  | 10.0  | 2.6   | 2.2        | 0.8   | 2.9  | 0.7 |
| F3                               | 6.6            | 0.6  | 4.3   | 3.5   | 1.8        | 0.2   | 2.3  | 0.1 |
| F4                               | 4.7            | 1.0  | 4.0   | 3.7   | 3.3        | 0.5   | 4.2  | 0.2 |
| F5                               | 4.6            | 0.8  | 3.0   | 1.3   | 6.6        | 0.6   | 7.2  | 0.3 |
| F6                               | 6.0            | 0.1  | 4.1   | 1.1   | 11.8       | 3.1   | 15.3 | 1.0 |
| F7                               | 8.2            | 0.7  | 6.8   | 2.2   | 18.8       | 1.5   | 19.3 | 1.2 |
| F8                               | 17.4           | 2.7  | 12.0  | 4.0   | 23.6       | 1.3   | 21.8 | 1.2 |
| F9                               | 24.0           | 0.8  | 36.3  | 18.1  | 26.3       | 2.4   | 20.9 | 2.1 |



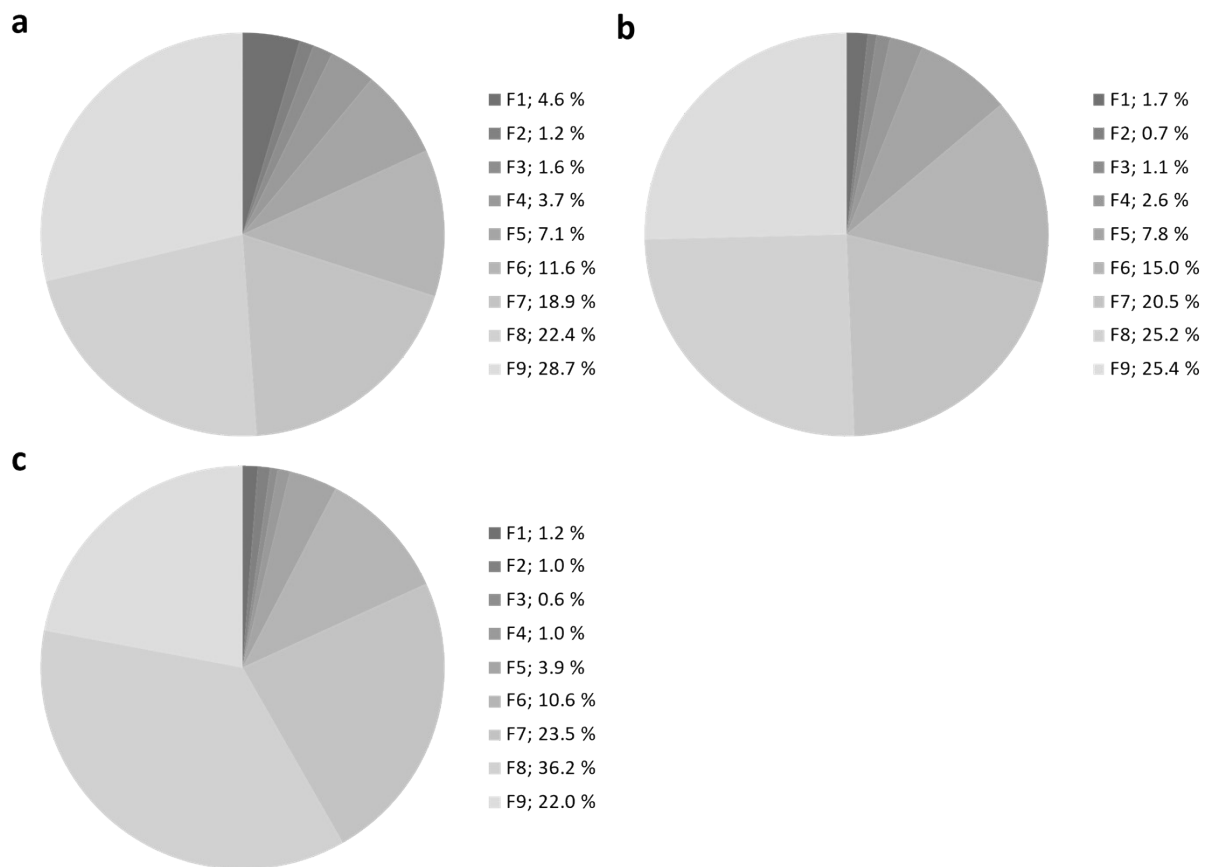

**Figure S5:** Count rate percentages of all fractions after separation using a sucrose gradient dependent on the volume of the dispersed phase  $V_D$ . Representation of the count rate percentages of (a) 2.5% (v/v), (b) 5% (v/v) and (c) 10% (v/v).

**Table S5:** Summary of the particle size (Z-Average), polydispersity index (Pdl), derived count rate (DCR) and the count rate percentage of fractions after separation using a sucrose gradient for the variation of dispersed phase volume. The values are given as mean  $\pm$  SD, n = 3.

| c             | Z-Average [nm]                   |      | Pdl      |       | DCR [kcps] |       |
|---------------|----------------------------------|------|----------|-------|------------|-------|
| PFC [% (v/v)] | Mean                             | SD   | Mean     | SD    | Mean       | SD    |
| 2.5           | 122.0                            | 1.9  | 0.305    | 0.018 | 3415.4     | 397.8 |
| 5             | 145.0                            | 17.9 | 0.292    | 0.017 | 3633.3     | 576.1 |
| 10            | 207.2                            | 5.0  | 0.283    | 0.024 | 3282.4     | 388.5 |
|               | <b>Count rate percentage [%]</b> |      |          |       |            |       |
|               | <b>2.5</b>                       |      | <b>5</b> |       | <b>10</b>  |       |
| Fraction      | Mean                             | SD   | Mean     | SD    | Mean       | SD    |
| F1            | 4.6                              | 0.9  | 1.7      | 0.4   | 1.2        | 0.4   |
| F2            | 1.2                              | 0.2  | 0.7      | 0.2   | 1.0        | 0.3   |
| F3            | 1.6                              | 0.1  | 1.1      | 0.3   | 0.6        | 0.1   |
| F4            | 3.7                              | 0.5  | 2.6      | 0.4   | 1.0        | 0.1   |
| F5            | 7.1                              | 0.7  | 7.8      | 2.1   | 3.9        | 0.3   |
| F6            | 11.8                             | 1.6  | 15.0     | 1.4   | 10.6       | 1.5   |
| F7            | 18.9                             | 0.8  | 20.5     | 1.2   | 23.5       | 3.0   |
| F8            | 22.4                             | 1.7  | 25.2     | 1.7   | 36.2       | 4.9   |
| F9            | 28.7                             | 3.4  | 25.4     | 1.4   | 22.0       | 8.2   |

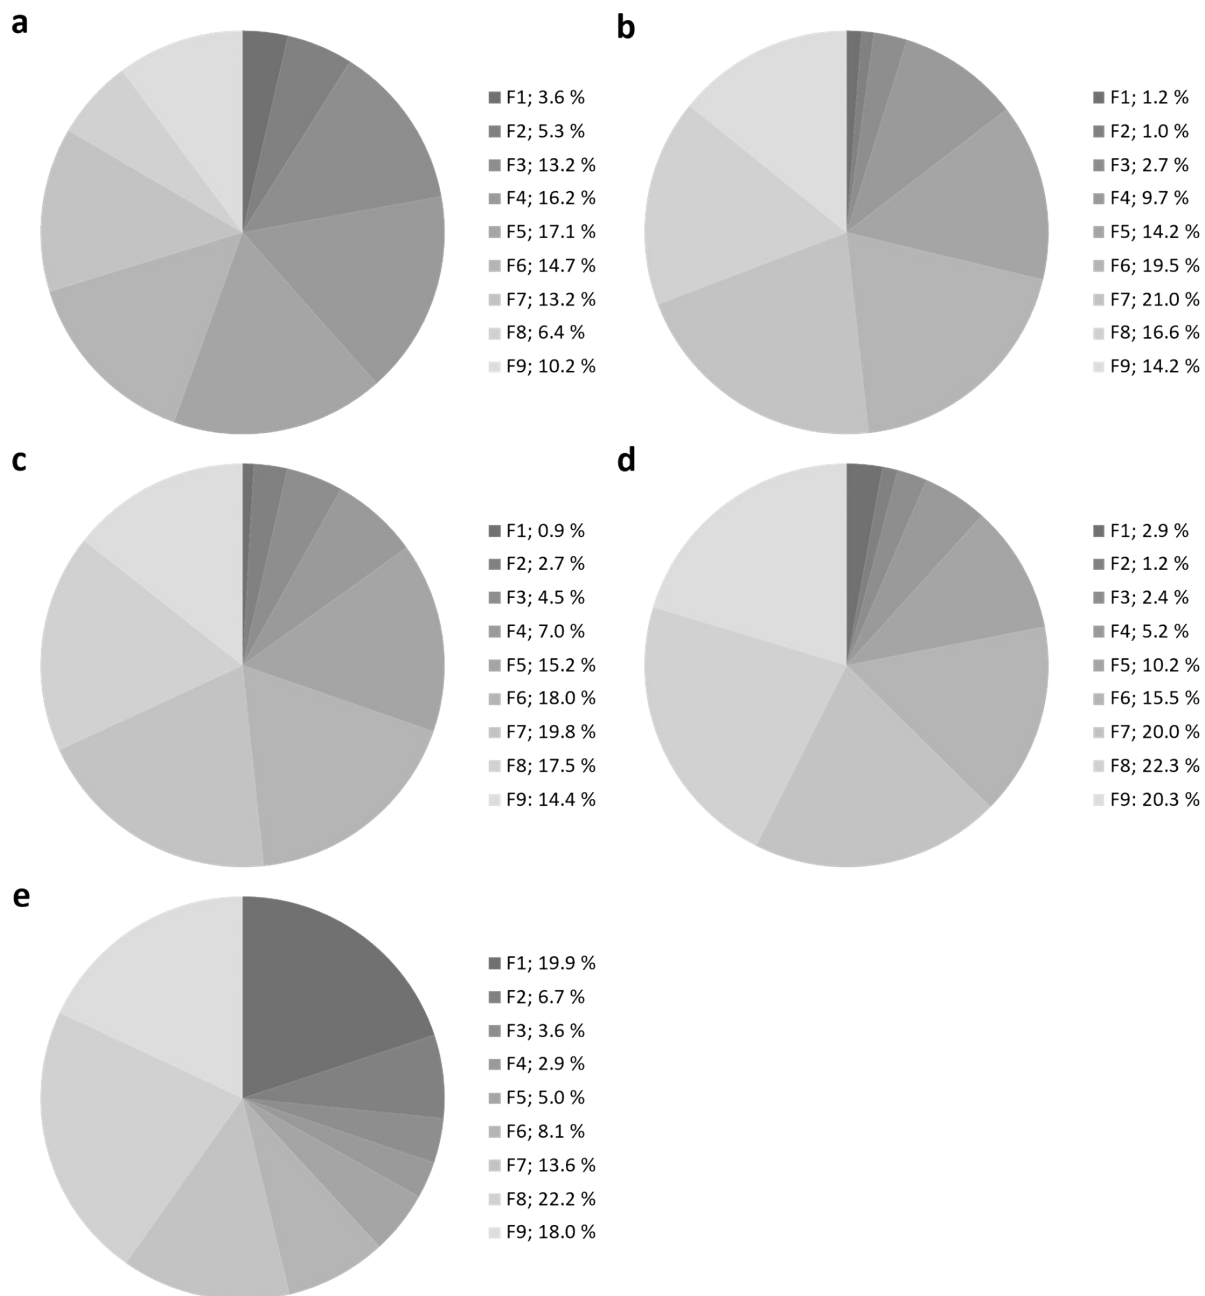

**Figure S6:** Count rate percentages of all fractions after separation using a sucrose gradient independent on the viscosity of the dispersed phase by variation of the PFC. Representation of the count rate percentages of (a) Perfluoroheptan (0.9 mPa·s), (b) Perfluoro-1,3-dimethylcyclohexane (1.9 mPa·s), (c) Perfluorooctoylbromid (2.3 mPa·s), (d) Perfluorodecalin (5.1 mPa·s) and (e) Perfluoroperhydro-phenanthrene (28.4 mPa·s).

**Table S6:** Summary of the particle size (Z-Average), polydispersity index (Pdl), derived count rate (DCR) and the count rate percentage of fractions after separation using a sucrose gradient for the variation of the perfluorocarbon (PFC) species. The values are given as mean  $\pm$  SD, n = 3.

| PFC species                      | Z-Average [nm]  |      | Pdl                              |       | DCR [kcps]             |        |                  |     |                               |     |
|----------------------------------|-----------------|------|----------------------------------|-------|------------------------|--------|------------------|-----|-------------------------------|-----|
|                                  | Mean            | SD   | Mean                             | SD    | Mean                   | SD     |                  |     |                               |     |
| Perfluoroheptan                  | 146.0           | 4.8  | 0.189                            | 0.012 | 16882.9                | 1798.3 |                  |     |                               |     |
| Perfluoro-1,3-dimethylcyclohexan | 179.4           | 11.9 | 0.146                            | 0.016 | 16898.7                | 121.1  |                  |     |                               |     |
| Perfluorooctoylbromid            | 154.1           | 0.2  | 0.180                            | 0.007 | 5675.1                 | 1066.0 |                  |     |                               |     |
| Perfluorodecalin                 | 178.8           | 8.9  | 0.233                            | 0.006 | 10402.2                | 1419.1 |                  |     |                               |     |
| Perfluoroperhydrophenanthrene    | 258.6           | 21.3 | 0.470                            | 0.069 | 3616.5                 | 331.0  |                  |     |                               |     |
| Count rate percentage [%]        |                 |      |                                  |       |                        |        |                  |     |                               |     |
| Fraction                         | Perfluoroheptan |      | Perfluoro-1,3-dimethylcyclohexan |       | Perfluoro-octoylbromid |        | Perfluorodecalin |     | Perfluoroperhydrophenanthrene |     |
|                                  | Mean            | SD   | Mean                             | SD    | Mean                   | SD     | Mean             | SD  | Mean                          | SD  |
| F1                               | 3.6             | 1.2  | 1.2                              | 0.0   | 0.9                    | 0.0    | 2.9              | 0.2 | 19.9                          | 2.5 |
| F2                               | 5.3             | 1.0  | 1.0                              | 0.0   | 2.7                    | 0.5    | 1.2              | 0.0 | 6.7                           | 1.2 |
| F3                               | 13.2            | 2.7  | 2.7                              | 0.2   | 4.5                    | 0.2    | 2.4              | 0.1 | 3.6                           | 1.1 |
| F4                               | 16.3            | 9.7  | 9.7                              | 1.9   | 7.0                    | 0.2    | 5.2              | 1.1 | 2.9                           | 0.4 |
| F5                               | 17.1            | 14.2 | 14.2                             | 0.3   | 15.2                   | 0.1    | 10.2             | 0.2 | 5.0                           | 0.1 |
| F6                               | 14.7            | 19.5 | 19.5                             | 0.1   | 18.0                   | 0.7    | 15.5             | 0.4 | 8.1                           | 0.1 |
| F7                               | 13.2            | 21.0 | 21.0                             | 0.3   | 19.8                   | 0.5    | 20.0             | 1.0 | 13.6                          | 2.7 |
| F8                               | 6.4             | 16.6 | 16.6                             | 2.1   | 17.5                   | 0.4    | 22.3             | 1.6 | 22.2                          | 1.3 |
| F9                               | 10.2            | 14.2 | 14.2                             | 0.0   | 14.4                   | 0.3    | 20.3             | 0.9 | 18.0                          | 5.3 |

**Table S7:** Calculation of the molecular surface area.

| Step | Description                                                       | Equation                                                                                                                                                                                                  |
|------|-------------------------------------------------------------------|-----------------------------------------------------------------------------------------------------------------------------------------------------------------------------------------------------------|
| 1    | Volume of PFC in each fraction per mL [ $\mu\text{L}/\text{mL}$ ] | $V_{PFC} [\mu\text{L}] = (1000 \cdot V_D[\% (v/v)]) \cdot \left(\frac{DCR\% F_X}{100}\right)$                                                                                                             |
| 2    | Conversion to [ $\text{m}^3$ ]                                    | $V_{PFC} [\text{m}^3] = V_{PFC} [\mu\text{L}] \cdot 10^{-9}$                                                                                                                                              |
| 3    | Volume of a PFC droplet in each fraction [ $\text{nm}^3$ ]        | $V_{droplet} [\text{nm}^3] = \frac{4}{3} \cdot \pi \cdot r_{F_X}^3$                                                                                                                                       |
| 4    | Conversion to [ $\text{m}^3$ ]                                    | $V_{droplet} [\text{m}^3] = V_{droplet} [\text{nm}^3] \cdot 10^{-27}$                                                                                                                                     |
| 5    | Surface area of a PFC droplet in each fraction [ $\text{nm}^2$ ]  | $A_{droplet} [\text{nm}^2] = 4 \cdot \pi \cdot r_{F_X}^2$                                                                                                                                                 |
| 6    | Conversion to [ $\text{m}^2$ ]                                    | $A_{droplet} [\text{m}^2] = A_{droplet} [\text{nm}^2] \cdot 10^{-18}$                                                                                                                                     |
| 7    | Number of droplets in each fraction per mL [ $1/\text{mL}$ ]      | $n_{PFC} \left[\frac{1}{\text{mL}}\right] = \frac{V_{PFC} [\text{m}^3]}{V_{droplet} [\text{m}^3]}$                                                                                                        |
| 8    | Surface area per mL of each fraction [ $\text{nm}^2/\text{mL}$ ]  | $A_{PFC} \left[\frac{\text{nm}^2}{\text{mL}}\right] = n_{PFC} \cdot A_{droplet} [\text{nm}^2]$                                                                                                            |
| 9    | Conversion to [ $\text{m}^2/\text{mL}$ ]                          | $A_{PFC} \left[\frac{\text{m}^2}{\text{mL}}\right] = A_{PFC} \left[\frac{\text{nm}^2}{\text{mL}}\right] \cdot 10^{-18}$                                                                                   |
| 10   | Number of lipid molecules per mL [ $1/\text{mL}$ ]                | $n_{PL} \left[\frac{1}{\text{mL}}\right] = c_{Lipid} \left[\frac{\text{mol}}{\text{mL}}\right] \cdot N_A \cdot RR_{PL}$                                                                                   |
| 11   | Corrected number of lipid molecules per mL                        | $n_{PLcorr} \left[\frac{1}{\text{mL}}\right] = n_{PL} \left[\frac{1}{\text{mL}}\right] \cdot (100 - (\sum DCR\%_{F1 + F2}) \cdot 2)$                                                                      |
| 12   | Molecular area [ $\text{m}^2/\text{molecule}$ ]                   | $A_{molecule} \left[\frac{\text{m}^2}{\text{molecule}}\right] = \frac{\sum F3 \text{ to } F9 \text{ of } A_{PFC} \left[\frac{\text{m}^2}{\text{mL}}\right]}{n_{PLcorr} \left[\frac{1}{\text{mL}}\right]}$ |
| 13   | Conversion to [ $\text{\AA}^2/\text{molecule}$ ]                  | $A_{molecule} \left[\frac{\text{m}^2}{\text{molecule}}\right] = \frac{A_{molecule} \left[\frac{\text{m}^2}{\text{molecule}}\right]}{10^{-20}}$                                                            |

RR = recovery rate of phospholipids

**Table S8:** Calculation of the effect of the dispersed volume  $V_D$  on the emulsion viscosity  $\eta_{emul.}$  using different theoretical models:

| $V_D$ [%<br>(v/v)] | $\eta_{emul.}/\eta_C$ |        |                       |
|--------------------|-----------------------|--------|-----------------------|
|                    | Einstein              | Guyon  | Krieger and Dougherty |
| 2.5                | 1.0625                | 1.0658 | 1.0659                |
| 5                  | 1.125                 | 1.138  | 1.1394                |
| 10                 | 1.25                  | 1.302  | 1.3145                |

Whereas:

Einstein (1905):  $\eta_{emul.}/\eta_C = (1 + 2.5 V_D)$

Guyon (1991):  $\eta_{emul.}/\eta_C = (1 + 2.5 V_D + 5.2 V_D^2)$

Krieger & Dougherty (1959)  $\eta_{emul.}/\eta_C = (1 - 5V_D/3)^{-1.5}$
